# Supplementary material
Source: Springer Nature journal article supplement (https://www.springermedizin.de/resource/supplementary/13221_2013_55_MOESM1_ESM.pdf/9680896)
Supplement: MOESM1 [file 9680896]

# Supplementary Figure 1

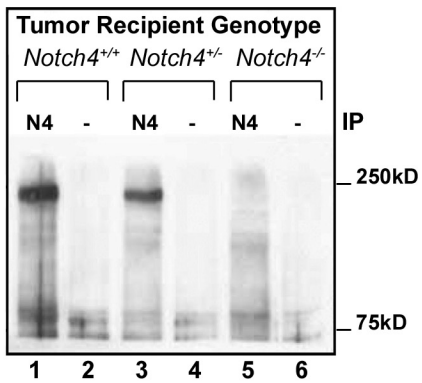

**Supplementary Figure 1: Mammary glands from *Notch4*<sup>-/-</sup> mice exhibit no detectable *Notch4* protein expression.** *Notch4* immunoprecipitation-immunoblot analysis on mammary tissue lysates from wild-type (lane 1), *Notch4*<sup>+/-</sup> (lane 3), and *Notch4*<sup>-/-</sup> (lane 5) mice shows a lack of *Notch4* protein in *Notch4*<sup>-/-</sup> mice. Lanes 2, 4 and 6 are the same samples immunoprecipitated with a control rabbit IgG.
